# Supplementary material
Source: Springer Nature journal article supplement (https://www.springermedizin.de/resource/supplementary/12943_2009_734_MOESM8_ESM.pdf/9554690)

Mean intercapillary distance (mm)

0,0600  
0,0400  
0,0200  
0,0000

16W DEN

20W DEN

25W DEN

30W DEN

\*\*\*

\*\*\*

\*\*\*

\*\*\*

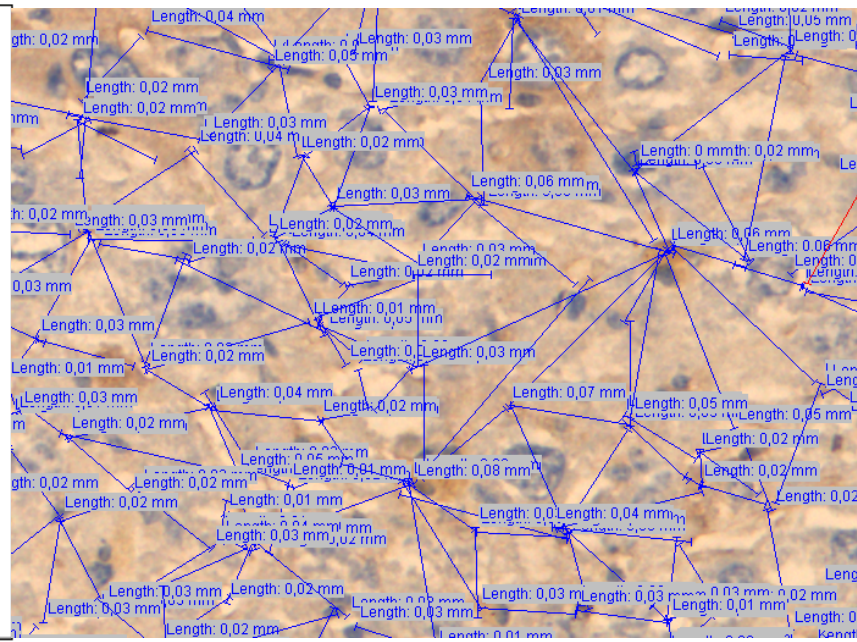

Supplement: MOESM8 [file 9554690]
